# Supplementary material for: Unitary and binary chromatographic fingerprints analysis of Epimedium
Source: Royal Society of Chemistry journal article supplement (doi:10.1039/c3ay40637g), 2013-01-01

## Common component 1

Mass spectra from sample

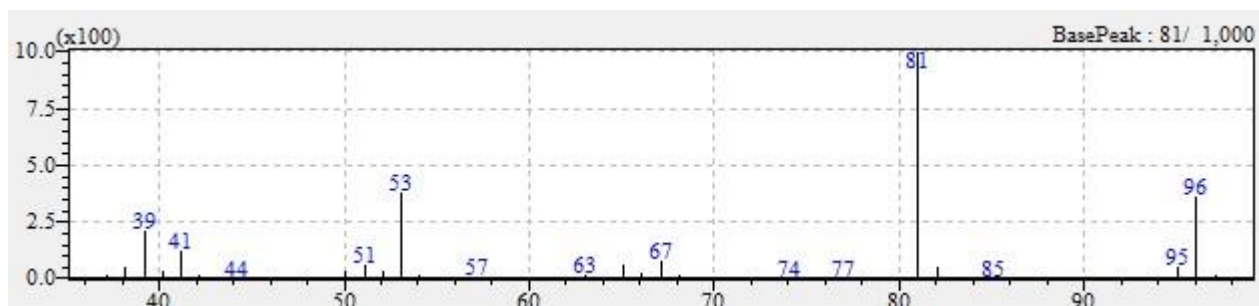

Reference mass spectra

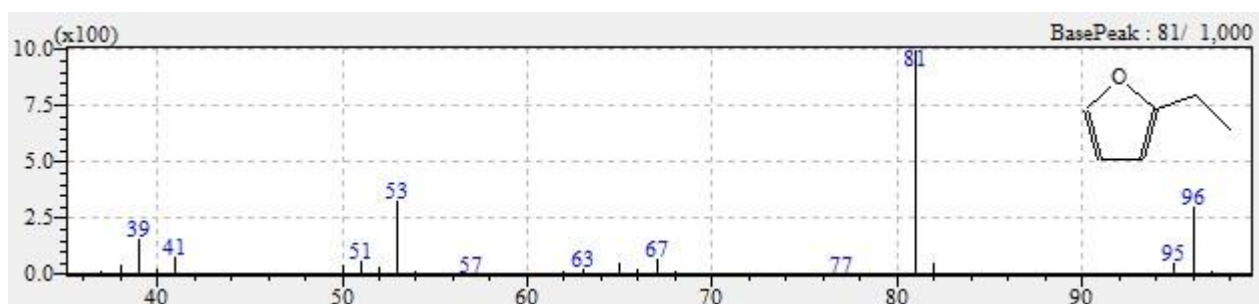

## Common component 2

Mass spectra from sample

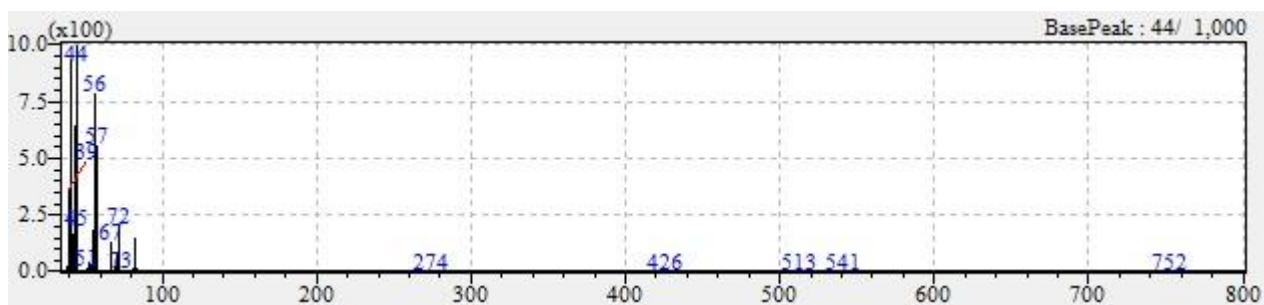

Reference mass spectra

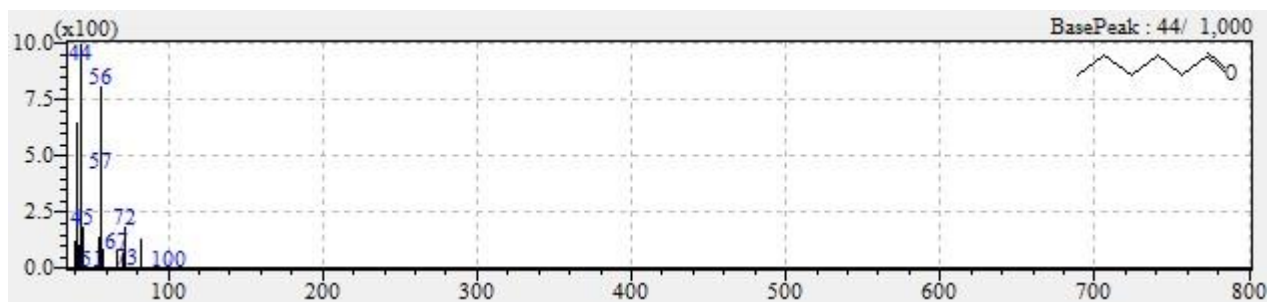

### Common component 3

Mass spectra from sample

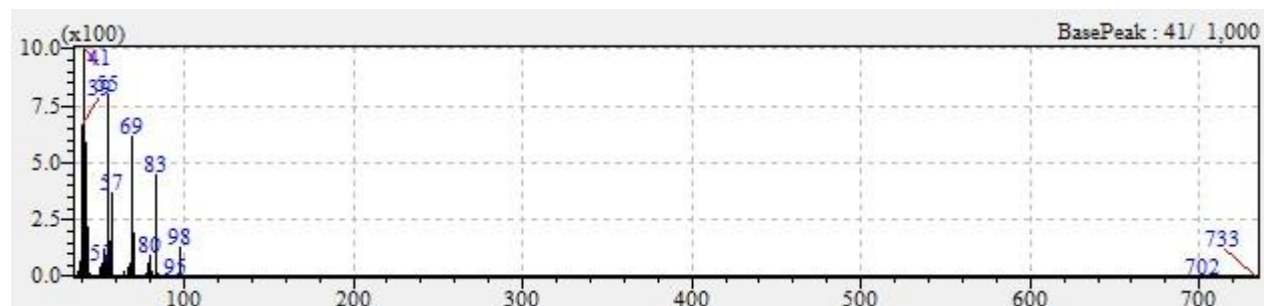

Reference mass spectra

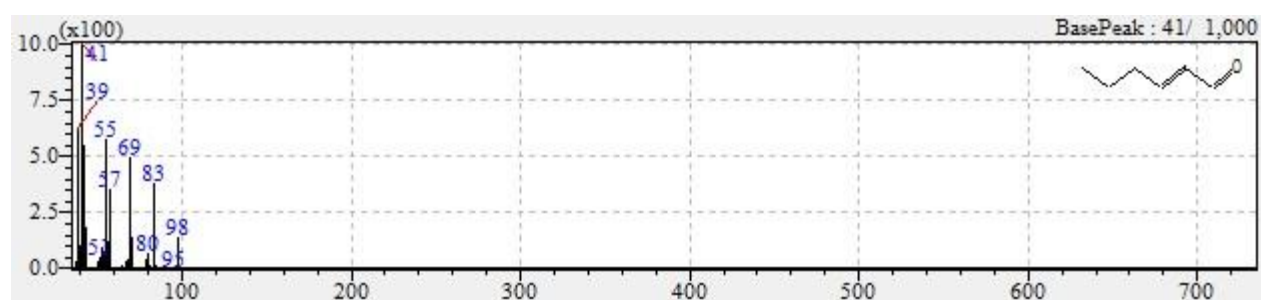

### Common component 4

Mass spectra from sample

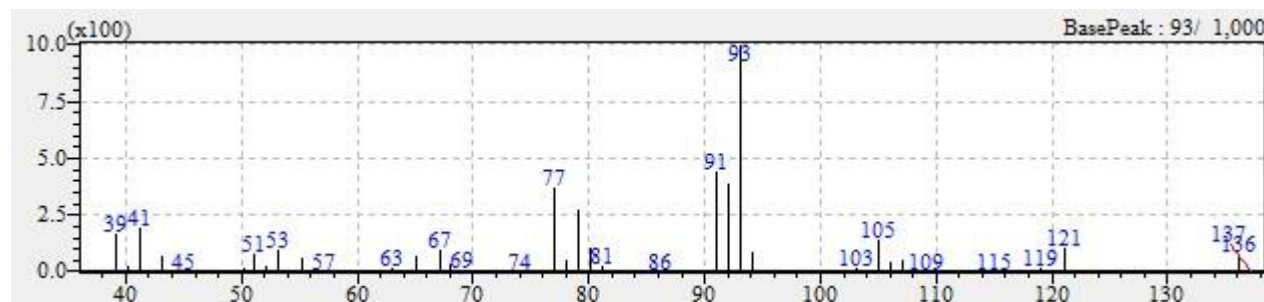

Reference mass spectra

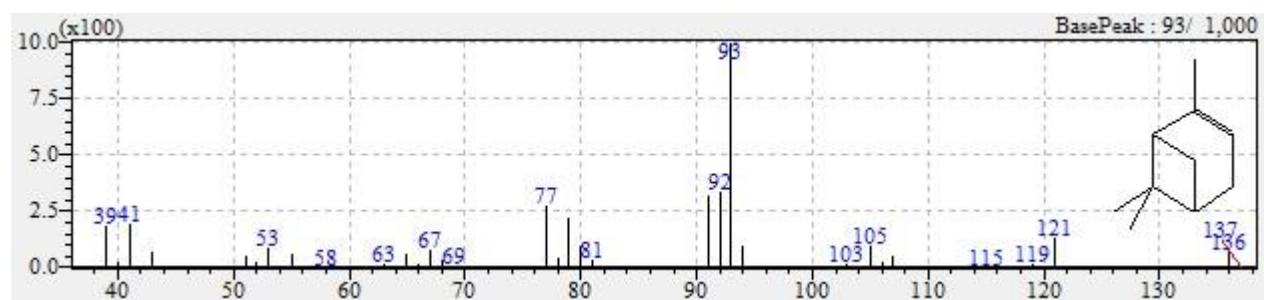

### Common component 5

Mass spectra from sample

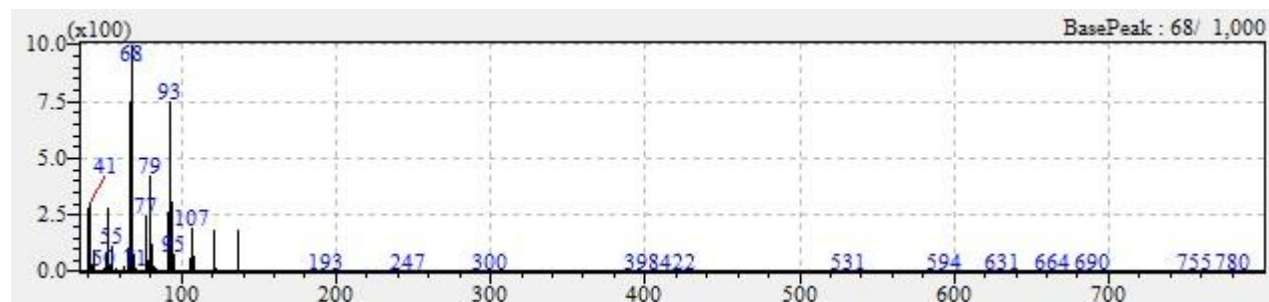

Reference mass spectra

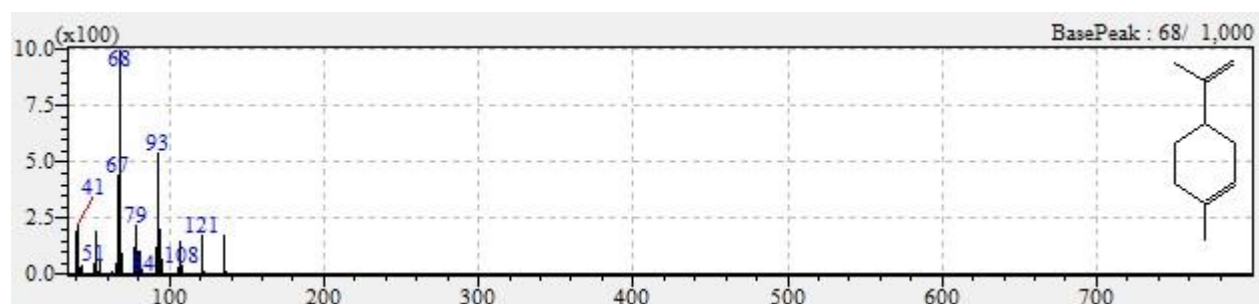

### Common component 6

Mass spectra from sample

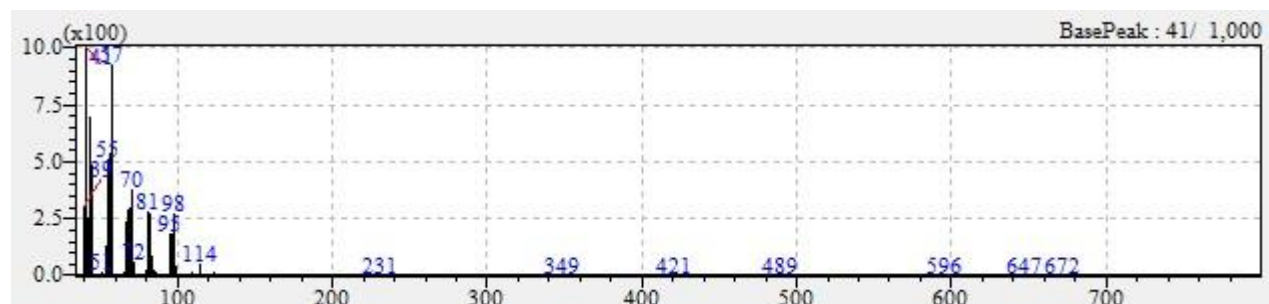

Reference mass spectra

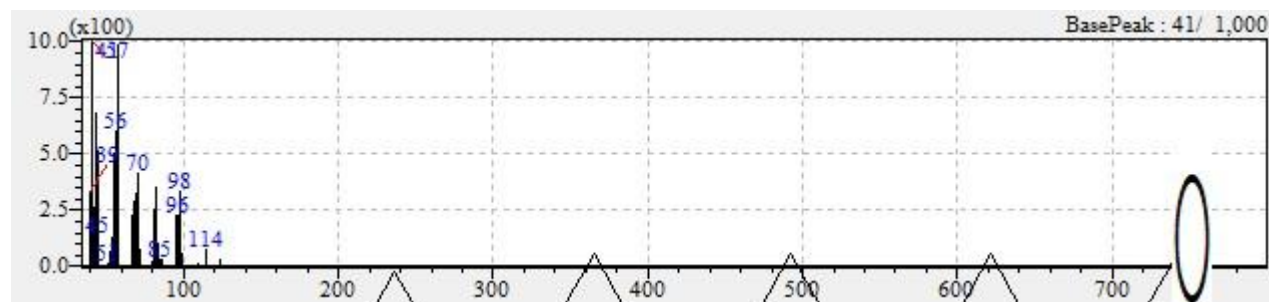

### Common component 7

Mass spectra from sample

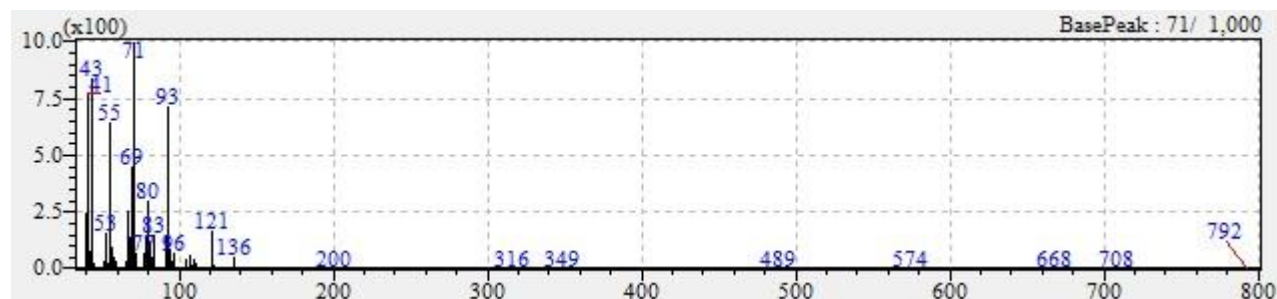

Reference mass spectra

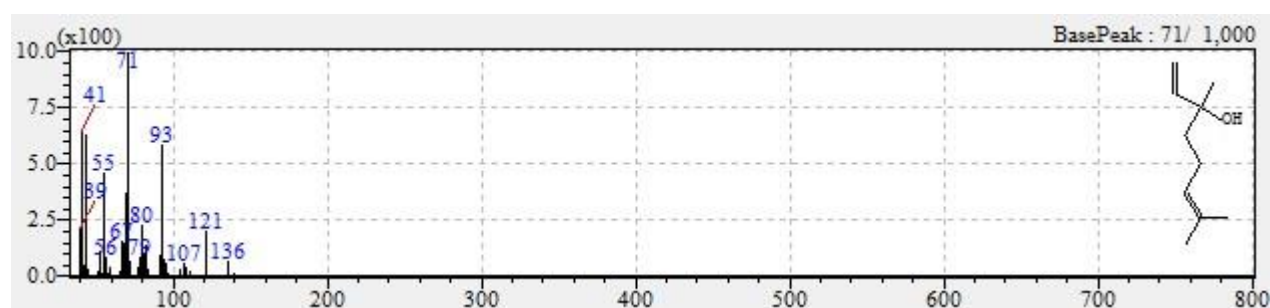

### Common component 8

Mass spectra from sample

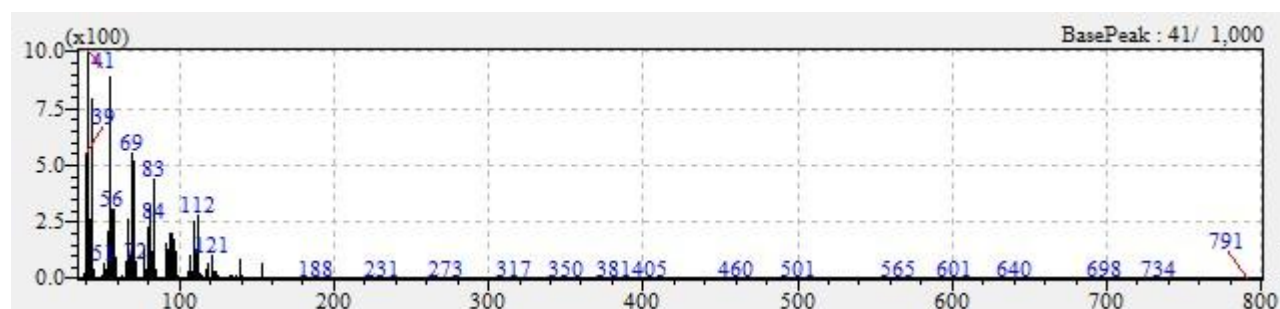

Reference mass spectra

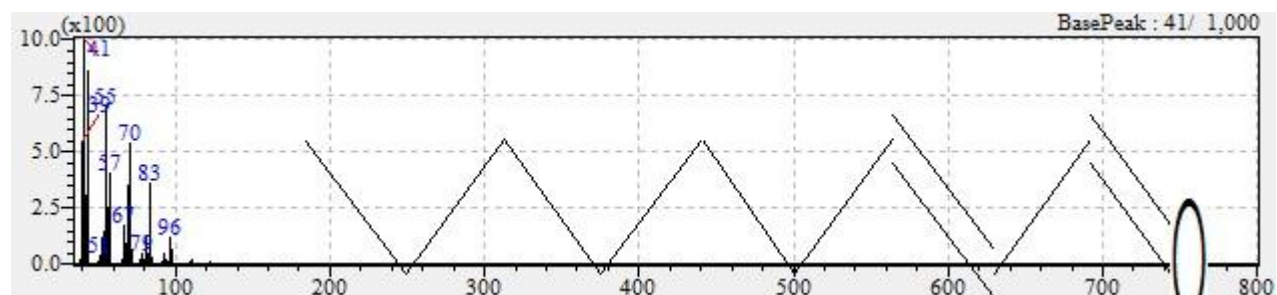

### Common component 9

Mass spectra from sample

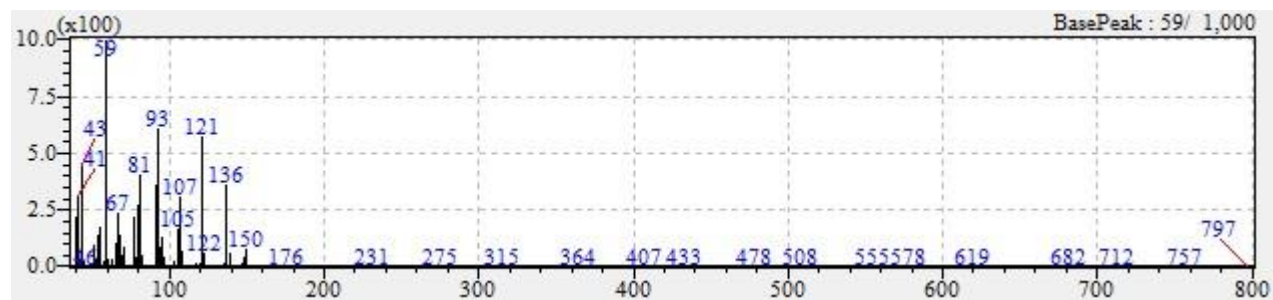

Reference mass spectra

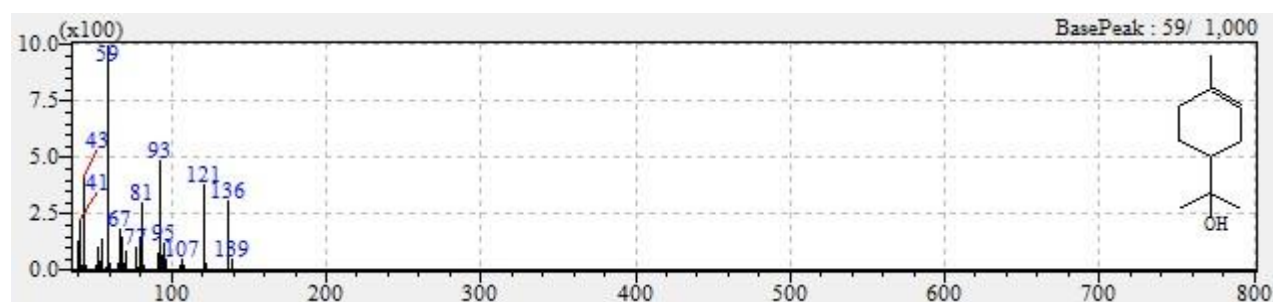

### Common component 10

Mass spectra from sample

Reference mass spectra

## Common component 11

Mass spectra from sample

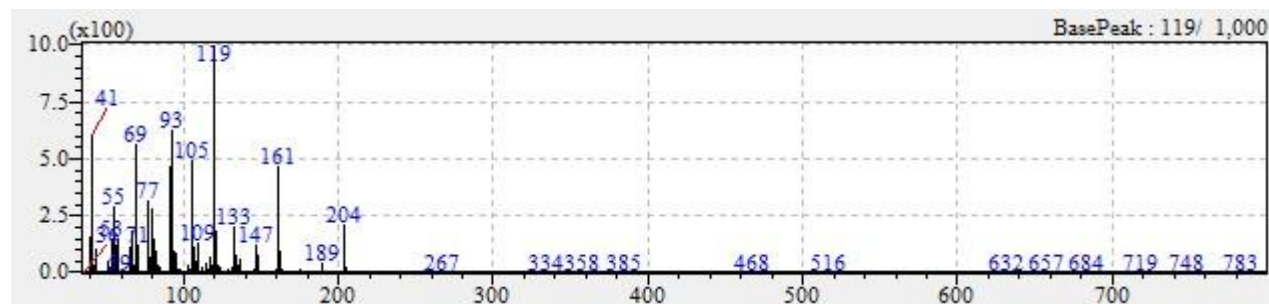

Reference mass spectra

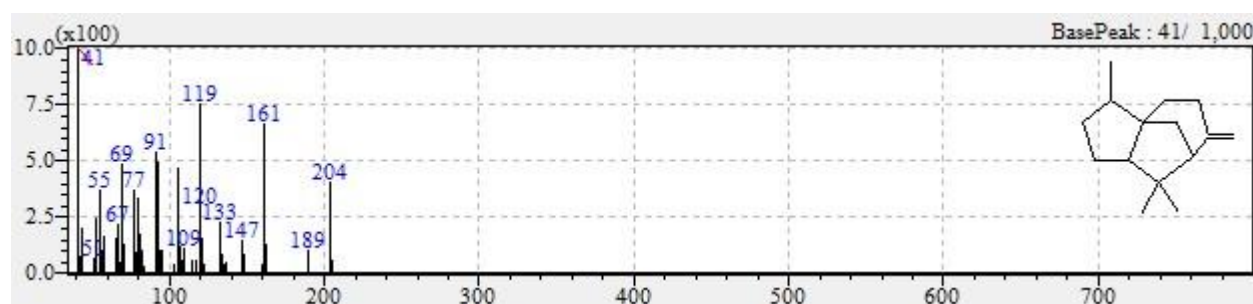

## Common component 12

Mass spectra from sample

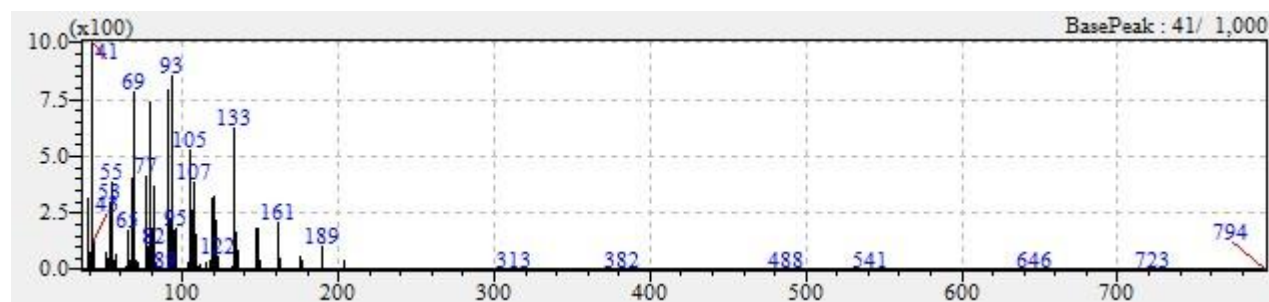

Reference mass spectra

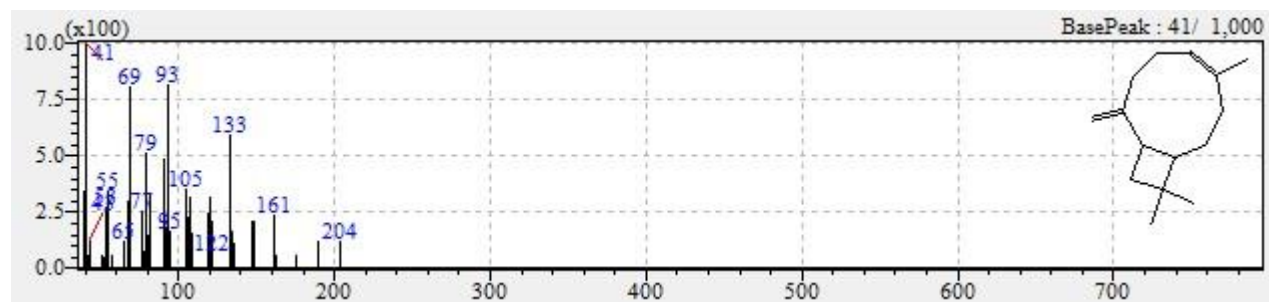

### Common component 13

Mass spectra from sample

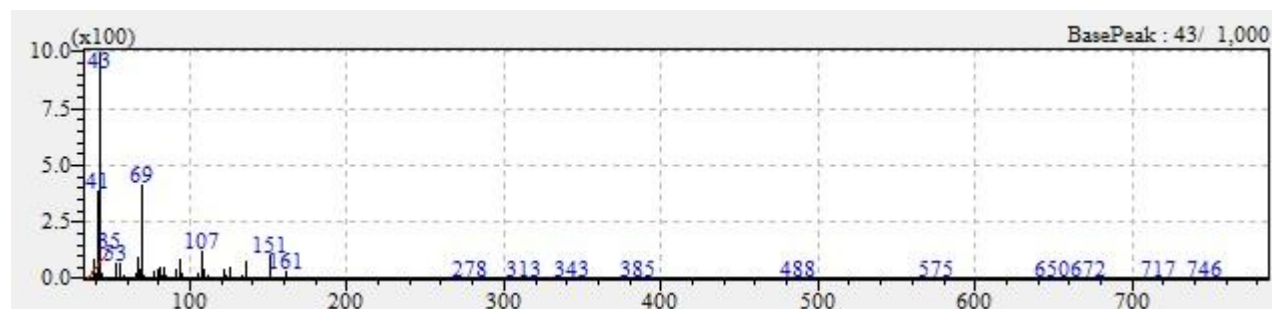

Reference mass spectra

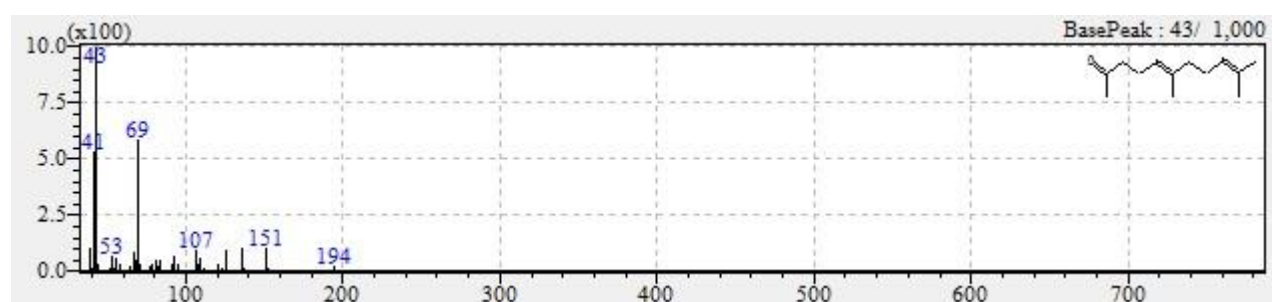

### Common component 14

Unknown (sesquiterpene)

Mass spectra from sample

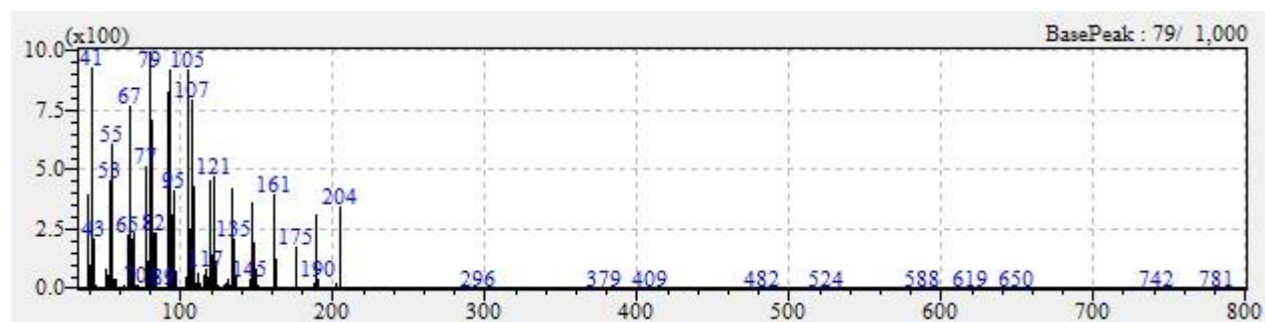

### Common component 15

Mass spectra from sample

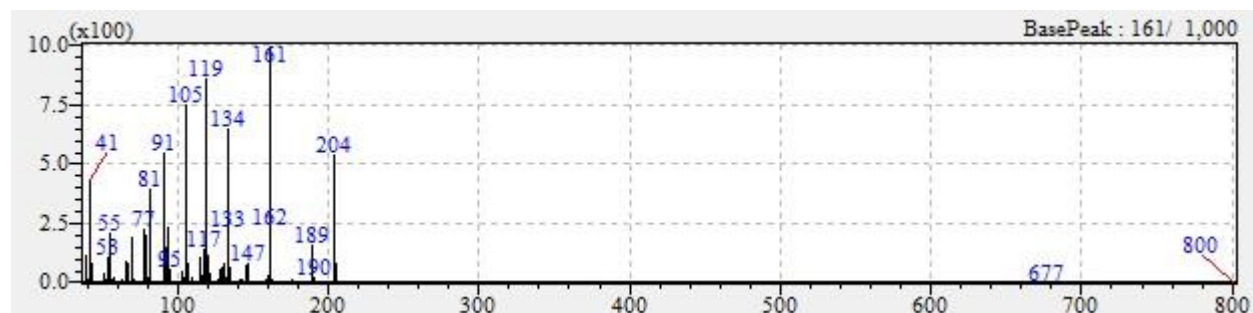

Reference mass spectra

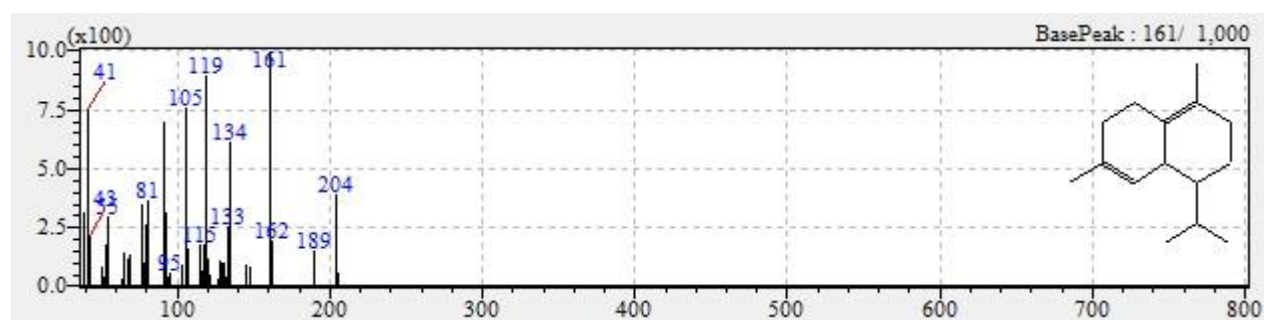

### Common component 16

Mass spectra from sample

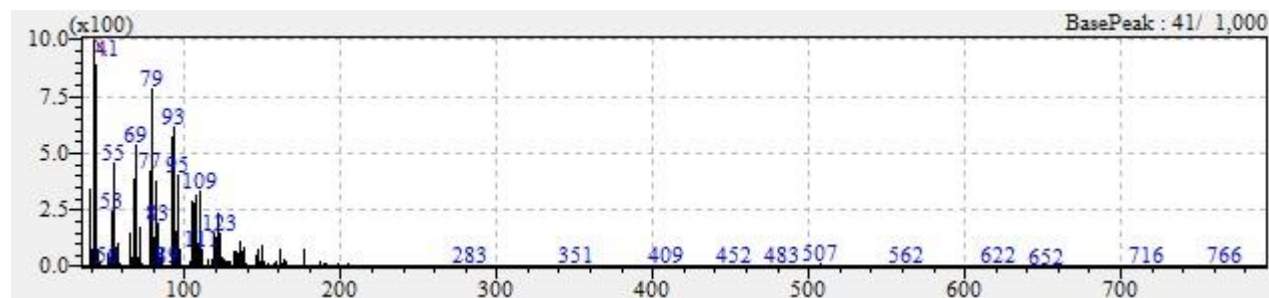

Reference mass spectra

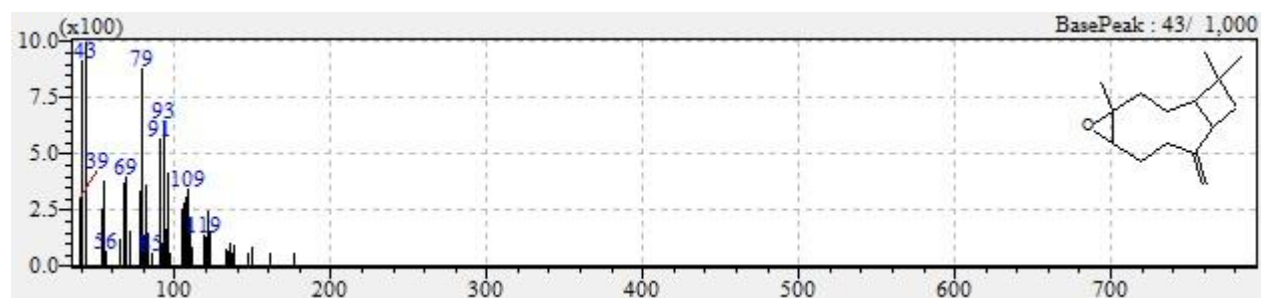



### Common component 17

Mass spectra from sample

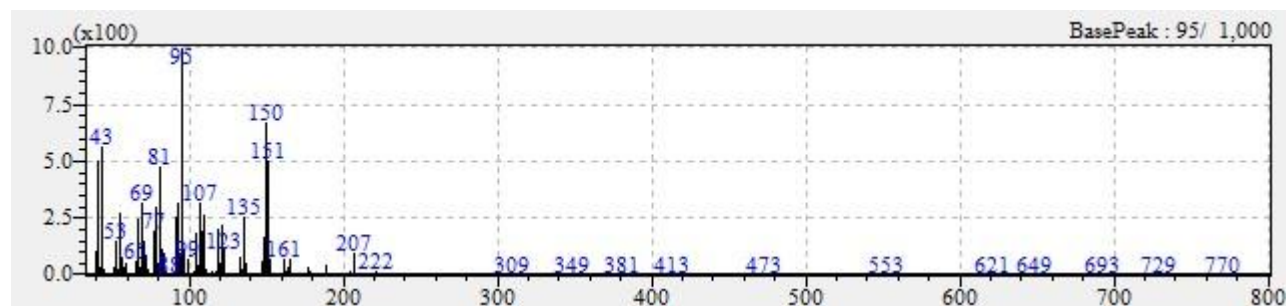

Reference mass spectra

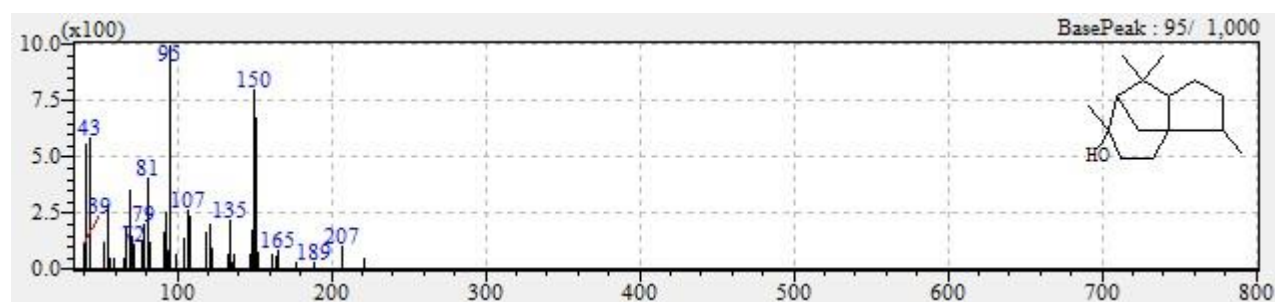

### Common component 18

Mass spectra from sample

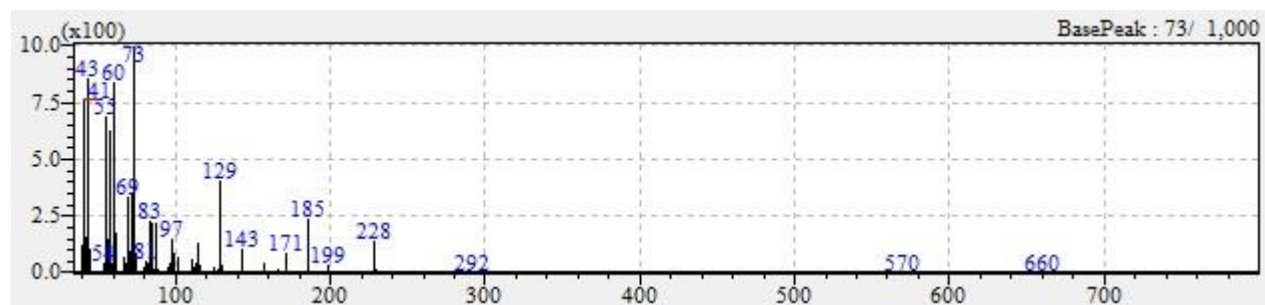

Reference mass spectra

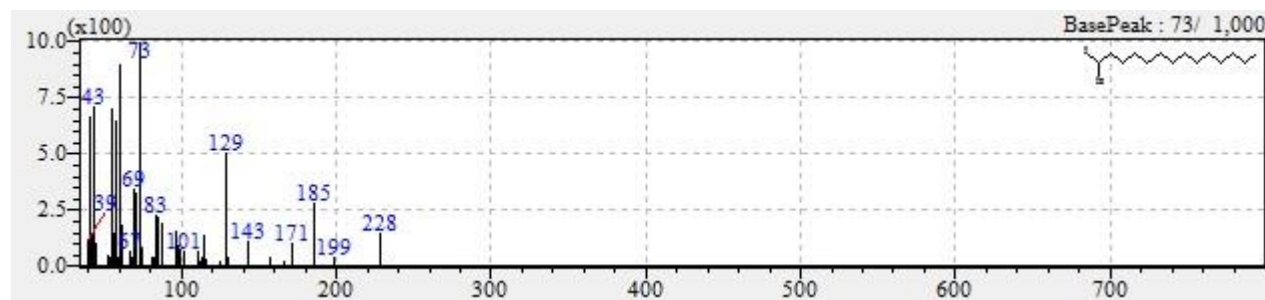

### Common component 19

Mass spectra from sample

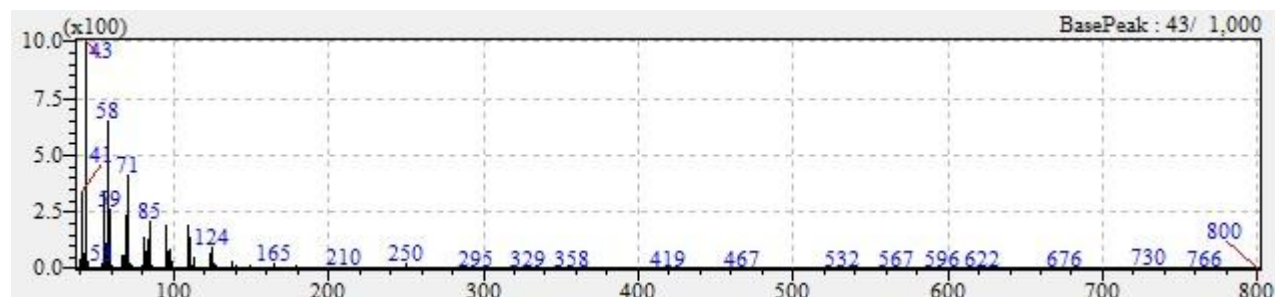

Reference mass spectra

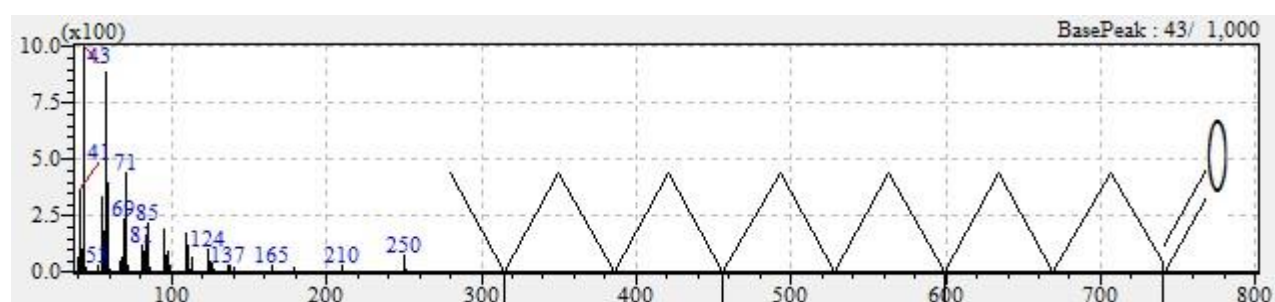

### Common component 20

Mass spectra from sample

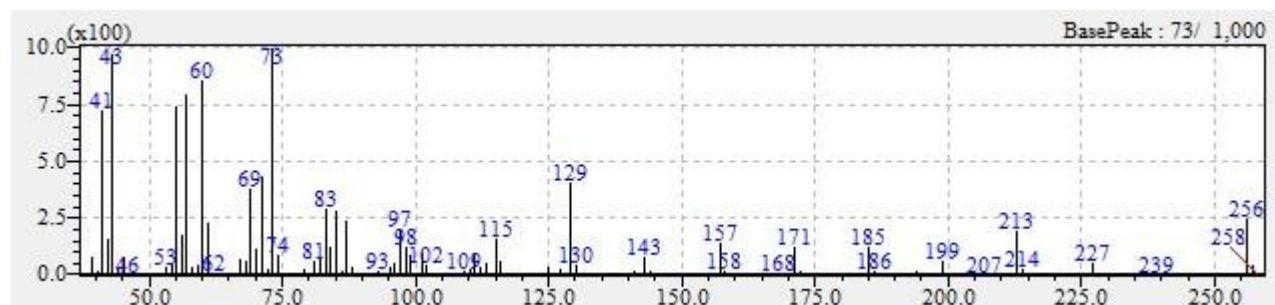

Reference mass spectra

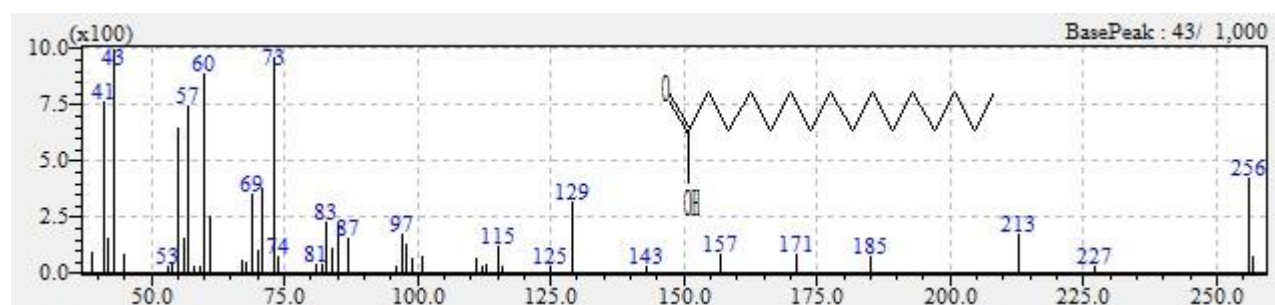

## Common component 21

Mass spectra from sample

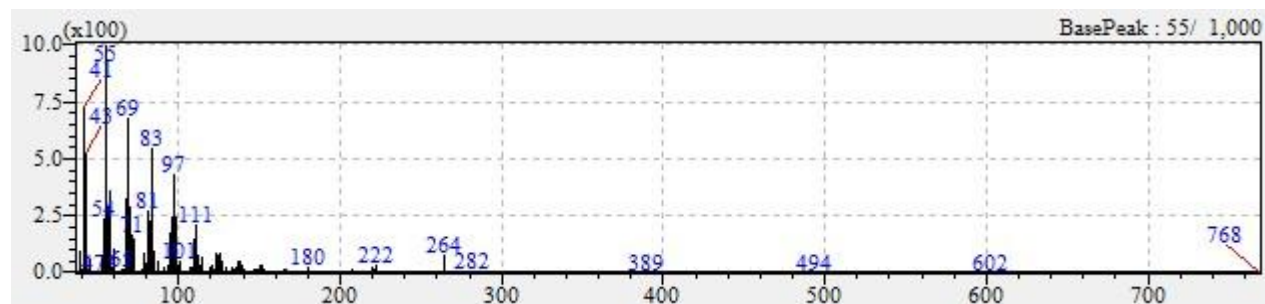

Reference mass spectra

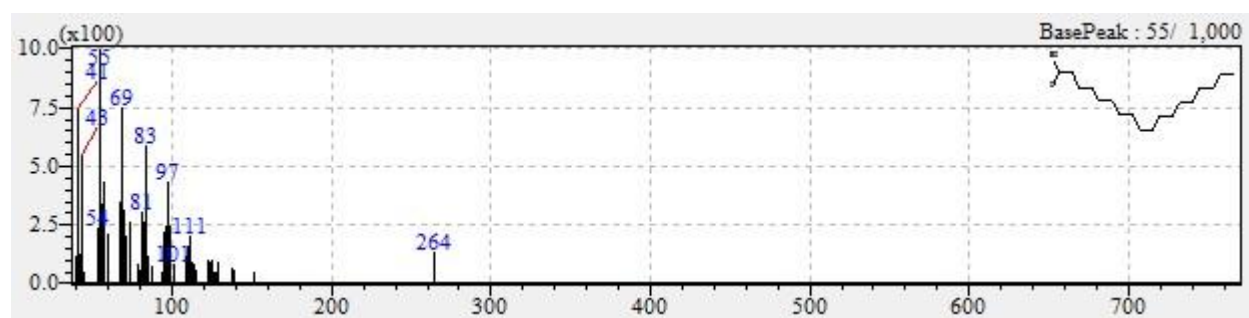

Supplement: c3ay40637g.pdf [file c3ay40637g.pdf]
